# Supplementary material
Source: PubMed Central journal article supplement (PMC3814060)
Supplement: NIHMS55317-supplement-supporting_Info.pdf [file NIHMS55317-supplement-supporting_Info.pdf]

## Supplementary Appendix

Supplement to Lazarus JH, Bestwick JP, Channon S, et al. Antenatal hypothyroid screening and childhood cognitive function.

### List of Appendices

- Table 1:** Number of women randomised to screen or control group, and number of women in each group who were positive and whose children completed testing
- Table 2:** Observed IQ scores according to randomisation group and psychologist
- Table 3:** Full scale child IQ Z-scores according to group
- Table 4:** Relative risk and risk difference (with 95% confidence intervals) of full scale IQ and verbal and performance IQ components being below specified cut-offs in the screen group compared with the control group.
- Table 5:** TSH and FT4 levels at initial visit (median 12,3 weeks gestation), 6 weeks after starting thyroxine therapy (median 20,0 weeks gestation) and at about 30 weeks (median 30,1 weeks gestation).
- Table 6:** On treatment analysis in 308 (79%) women judged to have complied with treatment (a fall of at least 10% in TSH and a rise of at least 10% in FT4 measurements: Relative risk and risk difference of standardised full scale IQ and verbal and performance IQ components being below specified cut-offs in screen group compared with control group
- Table 7:** Sub-group analyses of standardised full scale child IQ according to group
- Figure 1:** Ratio of TSH (a) and FT4 (b) at sampling (baseline, median 12,3 weeks and ratio at about 30 weeks (median 30,1 weeks gestation) to about 6 weeks after starting thyroxine therapy in screen group women (treated with T4).
- List:** Participating Obstetric Hospitals and Clinicians

**Web Appendix Table 1:** Number of women randomised to screen or control group, and number of women in each group who were positive and whose children completed testing

| Centre                                         | Recruited           |                      | Positive <sup>3</sup> |                      | Psychological tests completed |                      |
|------------------------------------------------|---------------------|----------------------|-----------------------|----------------------|-------------------------------|----------------------|
|                                                | Screen <sup>1</sup> | Control <sup>2</sup> | Screen <sup>1</sup>   | Control <sup>2</sup> | Screen <sup>1</sup>           | Control <sup>2</sup> |
| Britain                                        |                     |                      |                       |                      |                               |                      |
| Bristol                                        | 297                 | 297                  | 12                    | 14                   | 10                            | 9                    |
| Glan Clwyd                                     | 263                 | 261                  | 11                    | 12                   | 7                             | 12                   |
| Llandough                                      | 1,087               | 1,086                | 51                    | 54                   | 40                            | 40                   |
| Neville Hall                                   | 495                 | 492                  | 22                    | 14                   | 18                            | 13                   |
| Princess of Wales                              | 279                 | 281                  | 24                    | 28                   | 19                            | 20                   |
| Royal Glamorgan                                | 876                 | 874                  | 47                    | 42                   | 39                            | 37                   |
| Royal Gwent                                    | 1,710               | 1,705                | 79                    | 69                   | 62                            | 52                   |
| Singleton and Morriston<br>University Hospital | 921                 | 922                  | 45                    | 34                   | 37                            | 26                   |
| Wales                                          | 2,000               | 1,998                | 83                    | 91                   | 66                            | 73                   |
| Wrexham                                        | 250                 | 252                  | 8                     | 13                   | 6                             | 7                    |
| Turin                                          | 2746                | 2754                 | 117                   | 180                  | 86                            | 115                  |
| <i>Total</i>                                   | <i>10924</i>        | <i>10922</i>         | <i>499</i>            | <i>551</i>           | <i>390</i>                    | <i>404</i>           |

<sup>1</sup>Immediate assay of TSH and FT4

<sup>2</sup>Assay of TSH and FT4 post delivery

<sup>3</sup>High TSH and/or low FT4

**Web Appendix Table 2:** Observed IQ scores according to randomisation group and psychologist

| Randomisation group | Britain 1 |       |      | Britain 2 |       |      | Turin |       |      |
|---------------------|-----------|-------|------|-----------|-------|------|-------|-------|------|
|                     | N         | Mean  | SD   | N         | Mean  | SD   | N     | Mean  | SD   |
| Screen              | 207       | 107.3 | 11.7 | 97        | 110.3 | 13.2 | 86    | 109.2 | 16.2 |
| Control             | 208       | 106.5 | 12.7 | 81        | 110.9 | 13.1 | 115   | 114.1 | 14.5 |

**Web Appendix Table 3:** Full scale child IQ Z-scores according to group\*

|                      | Screen group<br>(Mothers treated<br>with T4, N=390) | Control group<br>(N=404) | Difference (95% CI)<br>( <i>control-screen</i> ) | p-value |
|----------------------|-----------------------------------------------------|--------------------------|--------------------------------------------------|---------|
| Mean IQ z-score (SD) | -0.05 (1.00)                                        | 0 (1)                    | 0.05 (-0.09 to 0.19)                             | 0.47    |
| IQ z-score < -1      | 13.1%                                               | 16.6%                    | 3.5% (-1.4 to 8.4%)                              | 0.16    |

\*Z-scores calculated within psychologist as (IQ score-Control group mean)/Control group standard deviation

**Web Appendix Table 4:** Relative risk and risk difference (with 95% confidence intervals) of full scale IQ and verbal and performance IQ components being below specified cut-offs in the screen group compared with the control group.

| IQ cut-off     | Relative risk (95% CI) | Risk difference (95% CI)<br>( <i>control-screened</i> ) | p-value |
|----------------|------------------------|---------------------------------------------------------|---------|
| Full scale IQ  |                        |                                                         |         |
| 75             | 1.43 (0.71 to 2.89)    | -1.40 (-4.10 to 1.30)                                   | 0.31    |
| 80             | 0.87 (0.55 to 1.37)    | 1.21 (-2.68 to 5.10)                                    | 0.54    |
| 85             | 0.85 (0.60 to 1.22)    | 2.06 (-2.63 to 6.74)                                    | 0.39    |
| 90             | 1.01 (0.78 to 1.31)    | -0.29 (-6.09 to 5.52)                                   | 0.92    |
| 95             | 1.02 (0.85 to 1.23)    | -0.74 (-7.39 to 5.91)                                   | 0.83    |
| 100            | 1.08 (0.94 to 1.24)    | -3.74 (-10.69 to 3.21)                                  | 0.29    |
| Verbal IQ      |                        |                                                         |         |
| 75             | 1.61 (0.71 to 3.68)    | -1.36 (-3.70 to 0.98)                                   | 0.25    |
| 80             | 1.00 (0.61 to 1.65)    | 0.00 (-3.59 to 3.59)                                    | 0.99    |
| 85             | 0.93 (0.63 to 1.37)    | 0.86 (-3.57 to 5.28)                                    | 0.71    |
| 90             | 0.97 (0.71 to 1.34)    | 0.44 (-4.68 to 5.55)                                    | 0.87    |
| 95             | 0.97 (0.78 to 1.20)    | 0.99 (-5.32 to 7.30)                                    | 0.76    |
| 100            | 0.93 (0.79 to 1.09)    | 3.25 (-3.65 to 10.14)                                   | 0.36    |
| Performance IQ |                        |                                                         |         |
| 75             | 0.90 (0.54 to 1.49)    | 0.76 (-2.80 to 4.32)                                    | 0.68    |
| 80             | 0.97 (0.67 to 1.41)    | 0.33 (-4.23 to 4.88)                                    | 0.89    |
| 85             | 1.06 (0.79 to 1.43)    | -1.15 (-6.54 to 4.24)                                   | 0.68    |
| 90             | 1.06 (0.83 to 1.34)    | -1.41 (-7.49 to 4.67)                                   | 0.65    |
| 95             | 1.09 (0.90 to 1.31)    | -3.03 (-9.70 to 3.64)                                   | 0.37    |
| 100            | 1.13 (0.97 to 1.30)    | -5.73 (-12.67 to 1.21)                                  | 0.11    |

**Web Appendix Table 5:** TSH and FT4 levels at initial visit (median 12,3 weeks gestation), 6 weeks after starting thyroxine therapy (median 20,0 weeks gestation) and at about 30 weeks (median 30,1 weeks gestation).

| Median gestation at sampling | Britain |                  |                  | Turin |                  |                 |
|------------------------------|---------|------------------|------------------|-------|------------------|-----------------|
|                              | N       | TSH (mIU/L)      | FT4 (pmol/L)     | N     | TSH (mIU/L)      | FT4 (pg/ml)     |
| 12.3 weeks                   | 304     | 3.78 (1.49-4.68) | 11.1 (10.5-13.3) | 86    | 3.05 (1.29-3.99) | 7.4 (7.1-8.6)   |
| 20.0 weeks                   | 285     | 0.31 (0.06-0.87) | 15.9 (14.4-17.7) | 84    | 0.10 (0.02-0.64) | 10.4 (9.1-12.1) |
| 30,1 weeks                   | 268     | 0.21 (0.02-0.83) | 15.3 (13.8-17.2) | 82    | 0.17 (0.03-0.73) | 9.2 (8.2-10.2)  |

**Web Appendix Table 6:** On treatment analysis in 308 (79%) women judged to have complied with treatment (a fall of at least 10% in TSH and a rise of at least 10% in FT4 measurements: Relative risk and risk difference of standardised full scale IQ and verbal and performance IQ components being below specified cut-offs in screen group compared with control group

| IQ cut-off            | Relative risk (95% CI) | Risk difference (95% CI)<br>( <i>control-screened</i> ) | p-value |
|-----------------------|------------------------|---------------------------------------------------------|---------|
| <b>Full scale IQ</b>  |                        |                                                         |         |
| 75                    | 1.31 (0.62 to 2.79)    | -1.00 (-3.83 to 1.83)                                   | 0.48    |
| 80                    | 0.78 (0.47 to 1.29)    | 2.02 (-2.01 to 6.04)                                    | 0.33    |
| 85                    | 0.71 (0.47 to 1.08)    | 4.04 (-0.73 to 8.82)                                    | 0.10    |
| 90                    | 0.92 (0.69 to 1.22)    | 1.82 (-4.24 to 7.89)                                    | 0.56    |
| 95                    | 0.98 (0.80 to 1.20)    | 0.81 (-6.23 to 7.85)                                    | 0.82    |
| 100                   | 1.06 (0.91 to 1.23)    | -2.65 (-10.05 to 4.76)                                  | 0.48    |
| <b>Verbal IQ</b>      |                        |                                                         |         |
| 75                    | 1.60 (0.67 to 3.82)    | -1.34 (-3.87 to 1.18)                                   | 0.28    |
| 80                    | 0.90 (0.52 to 1.57)    | 0.68 (-3.04 to 4.41)                                    | 0.72    |
| 85                    | 0.79 (0.51 to 1.23)    | 2.47 (-2.07 to 7.00)                                    | 0.29    |
| 90                    | 0.78 (0.54 to 1.12)    | 3.67 (-1.50 to 8.85)                                    | 0.17    |
| 95                    | 0.88 (0.69 to 1.12)    | 3.48 (-3.13 to 10.09)                                   | 0.31    |
| 100                   | 0.90 (0.76 to 1.07)    | 4.39 (-2.94 to 11.72)                                   | 0.24    |
| <b>Performance IQ</b> |                        |                                                         |         |
| 75                    | 0.96 (0.57 to 1.63)    | 0.28 (-3.57 to 4.13)                                    | 0.89    |
| 80                    | 0.89 (0.59 to 1.34)    | 1.34 (-3.41 to 6.09)                                    | 0.58    |
| 85                    | 1.06 (0.77 to 1.44)    | -1.01 (-6.75 to 4.73)                                   | 0.73    |
| 90                    | 1.05 (0.82 to 1.35)    | -1.30 (-7.78 to 5.18)                                   | 0.69    |
| 95                    | 1.06 (0.87 to 1.29)    | -1.96 (-9.05 to 5.14)                                   | 0.59    |
| 100                   | 1.09 (0.93 to 1.27)    | -4.05 (-11.45 to 3.34)                                  | 0.28    |

**Web Appendix Table 7: Sub-group analyses of standardised full scale child IQ according to group\***

| Sub-group                                                    | Screen group<br>(Mothers treated<br>with T4) | Control group | Difference (95% CI)<br>( <i>control-screen</i> ) | p-value |
|--------------------------------------------------------------|----------------------------------------------|---------------|--------------------------------------------------|---------|
| <b>Overall</b>                                               |                                              |               |                                                  |         |
| N                                                            | 390                                          | 404           |                                                  |         |
| Mean IQ (SD)                                                 | 99.2 (13.3)                                  | 100.0 (13.3)  | 0.8 (-1.1 to 2.6)                                | 0.40    |
| IQ<85                                                        | 12.1%                                        | 14.1%         | 2.1% (-2.6 to 6.7%)                              | 0.39    |
| <b>Positive on TSH<sup>1</sup></b>                           |                                              |               |                                                  |         |
| N                                                            | 209                                          | 219           |                                                  |         |
| Mean IQ (SD)                                                 | 100.4 (13.7)                                 | 100.7 (13.0)  | 0.3 (-2.2 to 2.8)                                | 0.82    |
| IQ<85                                                        | 11.0%                                        | 13.7%         | 2.7 (-3.5 to 8.9%)                               | 0.40    |
| <b>Positive on FT4<sup>2</sup></b>                           |                                              |               |                                                  |         |
| N                                                            | 204                                          | 207           |                                                  |         |
| Mean IQ (SD)                                                 | 97.8 (12.7)                                  | 99.2 (13.3)   | 1.3 (-1.3 to 3.8)                                | 0.28    |
| IQ<85                                                        | 13.2%                                        | 14.5%         | 1.3% (-5.4 to 7.9%)                              | 0.71    |
| <b>Positive on TSH and FT4<sup>3</sup></b>                   |                                              |               |                                                  |         |
| N                                                            | 23                                           | 22            |                                                  |         |
| Mean IQ (SD)                                                 | 97.7 (11.6)                                  | 99.4 (11.4)   | 1.7 (-5.2 to 8.6)                                | 0.61    |
| IQ<85                                                        | 13.0%                                        | 13.6%         | 0.6% (-19.3 to 20.5%)                            | 0.95    |
| <b>Thyroxine started &lt; 14 weeks gestation<sup>4</sup></b> |                                              |               |                                                  |         |
| N                                                            | 190 (62%)                                    | 404           |                                                  |         |
| Mean IQ (SD)                                                 | 98.7 (14.1)                                  | 100.0 (13.3)  | 1.3 (-1.1 to 3.6)                                | 0.28    |
| IQ<85                                                        | 14.2%                                        | 14.1%         | -0.1% (-6.1 to 5.9%)                             | 0.97    |
| <b>Thyroxine started ≥ 14 weeks gestation<sup>4</sup></b>    |                                              |               |                                                  |         |
| N                                                            | 116 (38%)                                    | 404           |                                                  |         |
| Mean IQ (SD)                                                 | 99.4 (13.2)                                  | 100.0 (13.3)  | 0.6 (-2.1 to 3.4)                                | 0.65    |
| IQ<85                                                        | 11.2%                                        | 14.1%         | 2.9% (-3.8 to 9.6%)                              | 0.42    |
| <b>Target TSH reached at 6 week appointment<sup>5</sup></b>  |                                              |               |                                                  |         |
| N                                                            | 292 (79%)                                    | 404           |                                                  |         |
| Mean IQ (SD)                                                 | 99.3 (12.9)                                  | 100.0 (13.3)  | 0.7 (-1.3 to 2.7)                                | 0.49    |
| IQ<85                                                        | 10.3%                                        | 14.1%         | 3.8% (-1.0 to 8.7%)                              | 0.13    |
| <b>Target TSH reached at 30 week appointment<sup>5</sup></b> |                                              |               |                                                  |         |
| N                                                            | 277 (79%)                                    | 404           |                                                  |         |
| Mean IQ (SD)                                                 | 100.0 (13.0)                                 | 100.0 (13.3)  | -0.0 (-2.0 to 2.0)                               | 0.99    |
| IQ<85                                                        | 11.2%                                        | 14.1%         | 2.9% (-2.1 to 7.9%)                              | 0.26    |

<sup>1</sup>p, interaction =0.74<sup>2</sup>p, interaction =0.73<sup>3</sup>p, interaction=0.88<sup>4</sup>Date thyroxine first given not recorded in all women<sup>5</sup>Target TSH 1.0 mIU/L, not all women attended appointment



**Web Appendix Figure 1:** Ratio of TSH (a) and FT4 (b) at sampling (baseline, median 12.3 weeks gestation) to about 6 weeks after starting thyroxine therapy (median 20.0 weeks gestation) and ratio at about 30 weeks (median 30.1 weeks gestation) to about 6 weeks after starting thyroxine therapy in screen group women (treated with T4).

**(a) TSH**

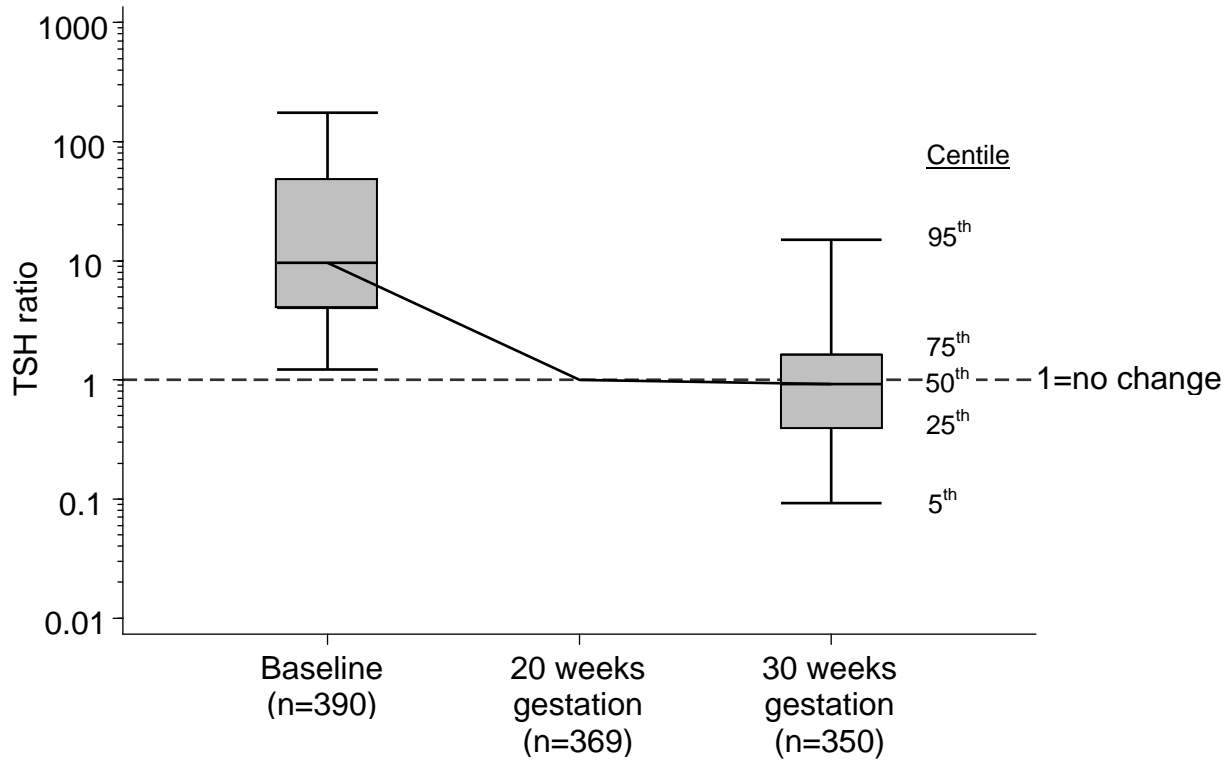

**(b) FT4**

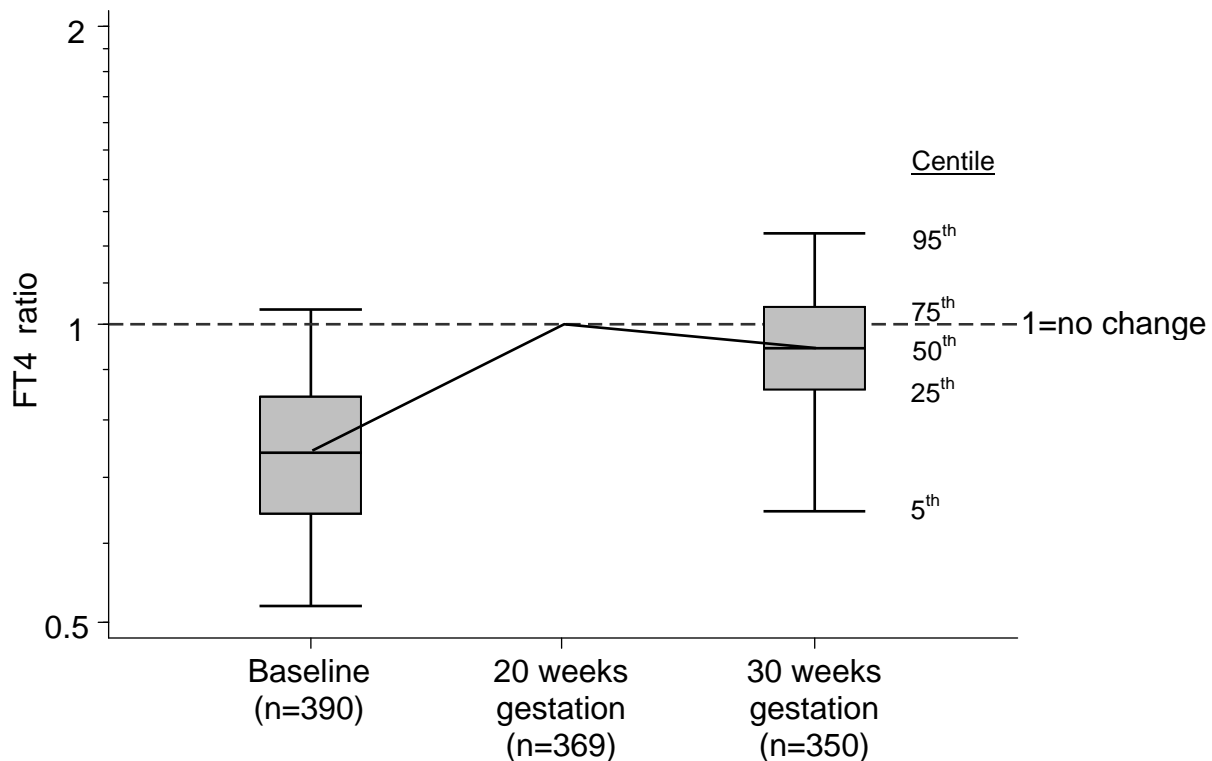

Participating Obstetric Hospitals and clinicians  
BRITAIN

Glan Clwyd Hospital, Bodelwyddan, North Wales. P Banfield, N Bickerton, N Clark

Llandough University Hospital, Cardiff, South Glamorgan. A Rees

Morrison Hospital, Swansea, West Glamorgan. R Llewelyn

Neville Hall Hospital, Abergavenny, Gwent. A Dawson

Princess of Wales Hospital, Bridgend, Mid Glamorgan. A Allman

Royal Glamorgan Hospital, Llantrisant, Mid Glamorgan. S Vine

Royal Gwent Hospital, Newport, Gwent. J Wiener

Singleton Hospital, Swansea, West Glamorgan. S Emery

Southmead Hospital, Bristol, Avon. T Draycott

University Hospital of Wales, Cardiff, South Glamorgan. N Davies

Wrexham Maelor Hospital, Wrexham, North Wales. R Vlies

ITALY

Azienda Ospedaliera OIRM- Sant' Anna, Turin, Italy. M Campogrande
